# Supplementary material for: A phosphorylation-and-ubiquitylation circuitry driving ATR activation and homologous recombination
Source: Oxford University Press journal article supplement (doi:10.1093/nar/gkx571), 2017-06-26
Supplement: gkx571_Supp.pdf [file gkx571_Supp.pdf]

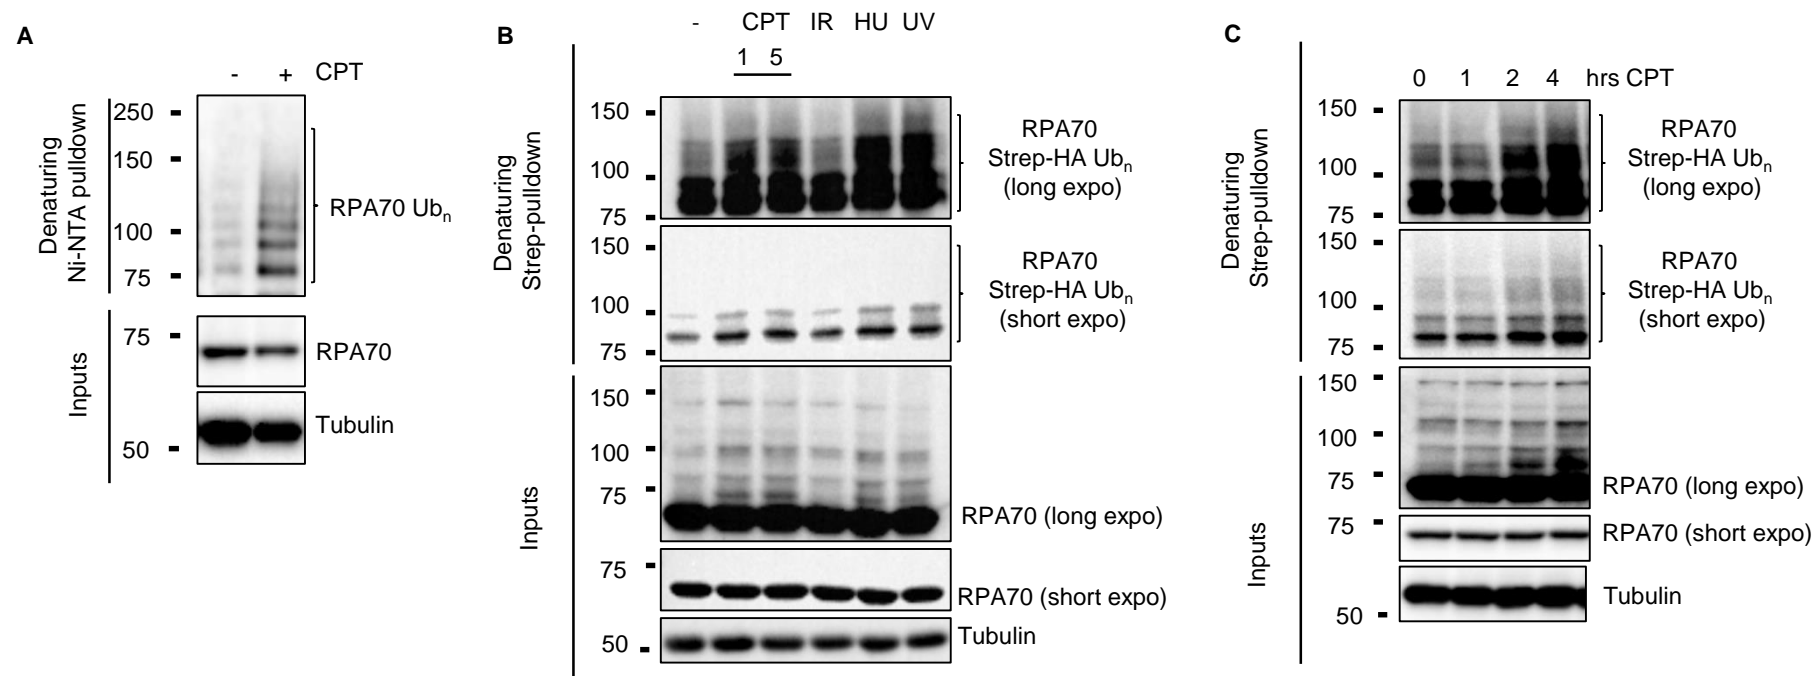

**Supplementary Figure S1. RPA70 is ubiquitylated in response to DNA damage.** (A) Cells were transfected with a vector expressing His<sub>6</sub>-ubiquitin and lysed under denaturing conditions. Ni-NTA pull-down was performed to isolate ubiquitylated proteins. The indicated proteins were detected with specific antibodies. (B) Cells were transfected with a vector expressing Strep-HA ubiquitin and treated with 1 or 5  $\mu$ M CPT, 10  $\gamma$  IR, 4 mM HU or 50 J/m<sup>2</sup> UV for 4 hrs. Ubiquitylated proteins were isolated by Strep-Tactin pull-down under denaturing conditions. (C) Cells transfected as in (B) were treated with 1  $\mu$ M CPT for the indicated times and RPA70 was detected after Strep-Tactin pull-down.

**A**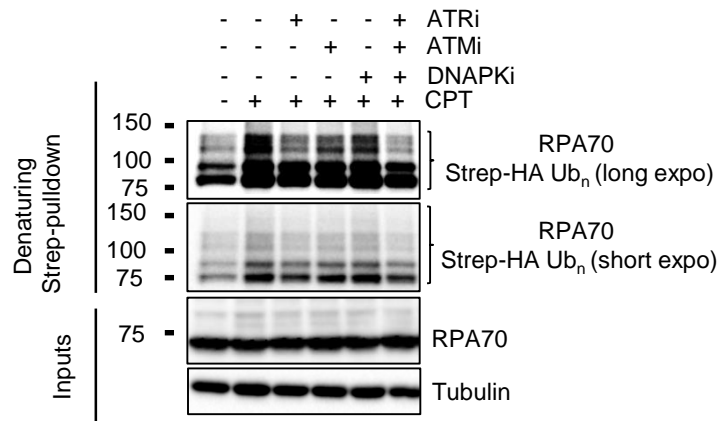**B**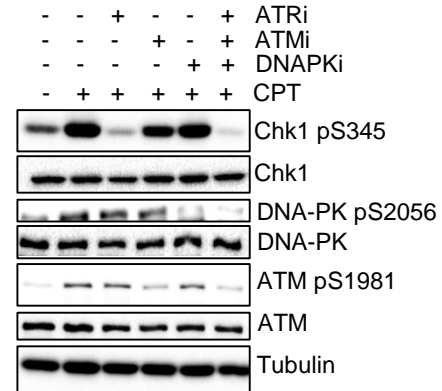

**Supplementary Figure S2. RPA70 ubiquitylation is regulated by PI3K-like kinases.** (A) Cells were transfected with a vector expressing Strep-HA ubiquitin, pre-treated for 1 hr with VE-821 (ATRi, 10  $\mu$ M), KU55933 (ATMi, 10  $\mu$ M), NU7441 (DNAPKi, 2  $\mu$ M) or a combination of all 3 inhibitors, treated with 1  $\mu$ M CPT for 3 hrs and lysed under denaturing conditions. Strep-Tactin pulldown was performed to isolate ubiquitylated proteins. (B) U2OS cells were treated as in **Figure 2 C,D**, lysed and the efficiency of the various inhibitors was assessed by monitoring DNA-PK, CHK1 and CHK2 phosphorylation levels.

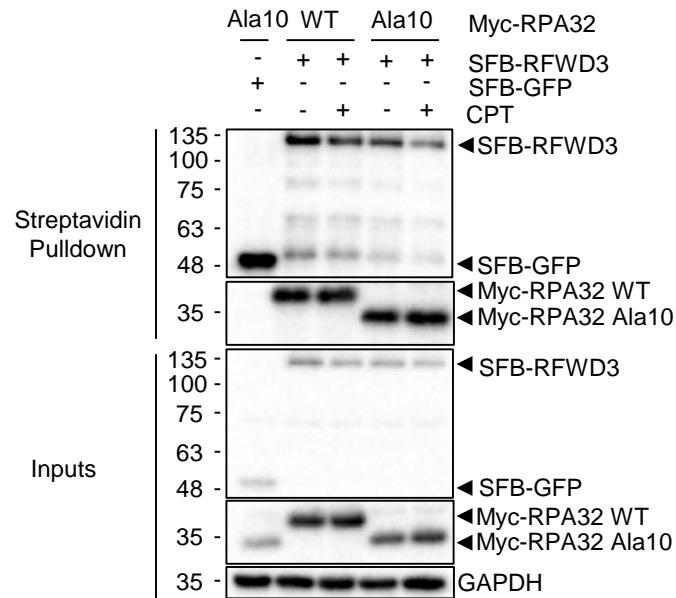

**Supplementary Figure S3. Disruption of RPA32 phosphorylation does not affect its constitutive interaction with RFWD3.** Cells were transfected with a vector expressing SFB-RFWD3 or SFB-GFP along with a vector expressing myc-RPA32 WT or myc-RPA32 Ala10. 24 hrs later, cells were treated or not with 1 uM CPT for 3 hrs and streptavidin pulldown was performed to isolate SFB-proteins and their interactors. The indicated proteins were detected by immunoblotting.

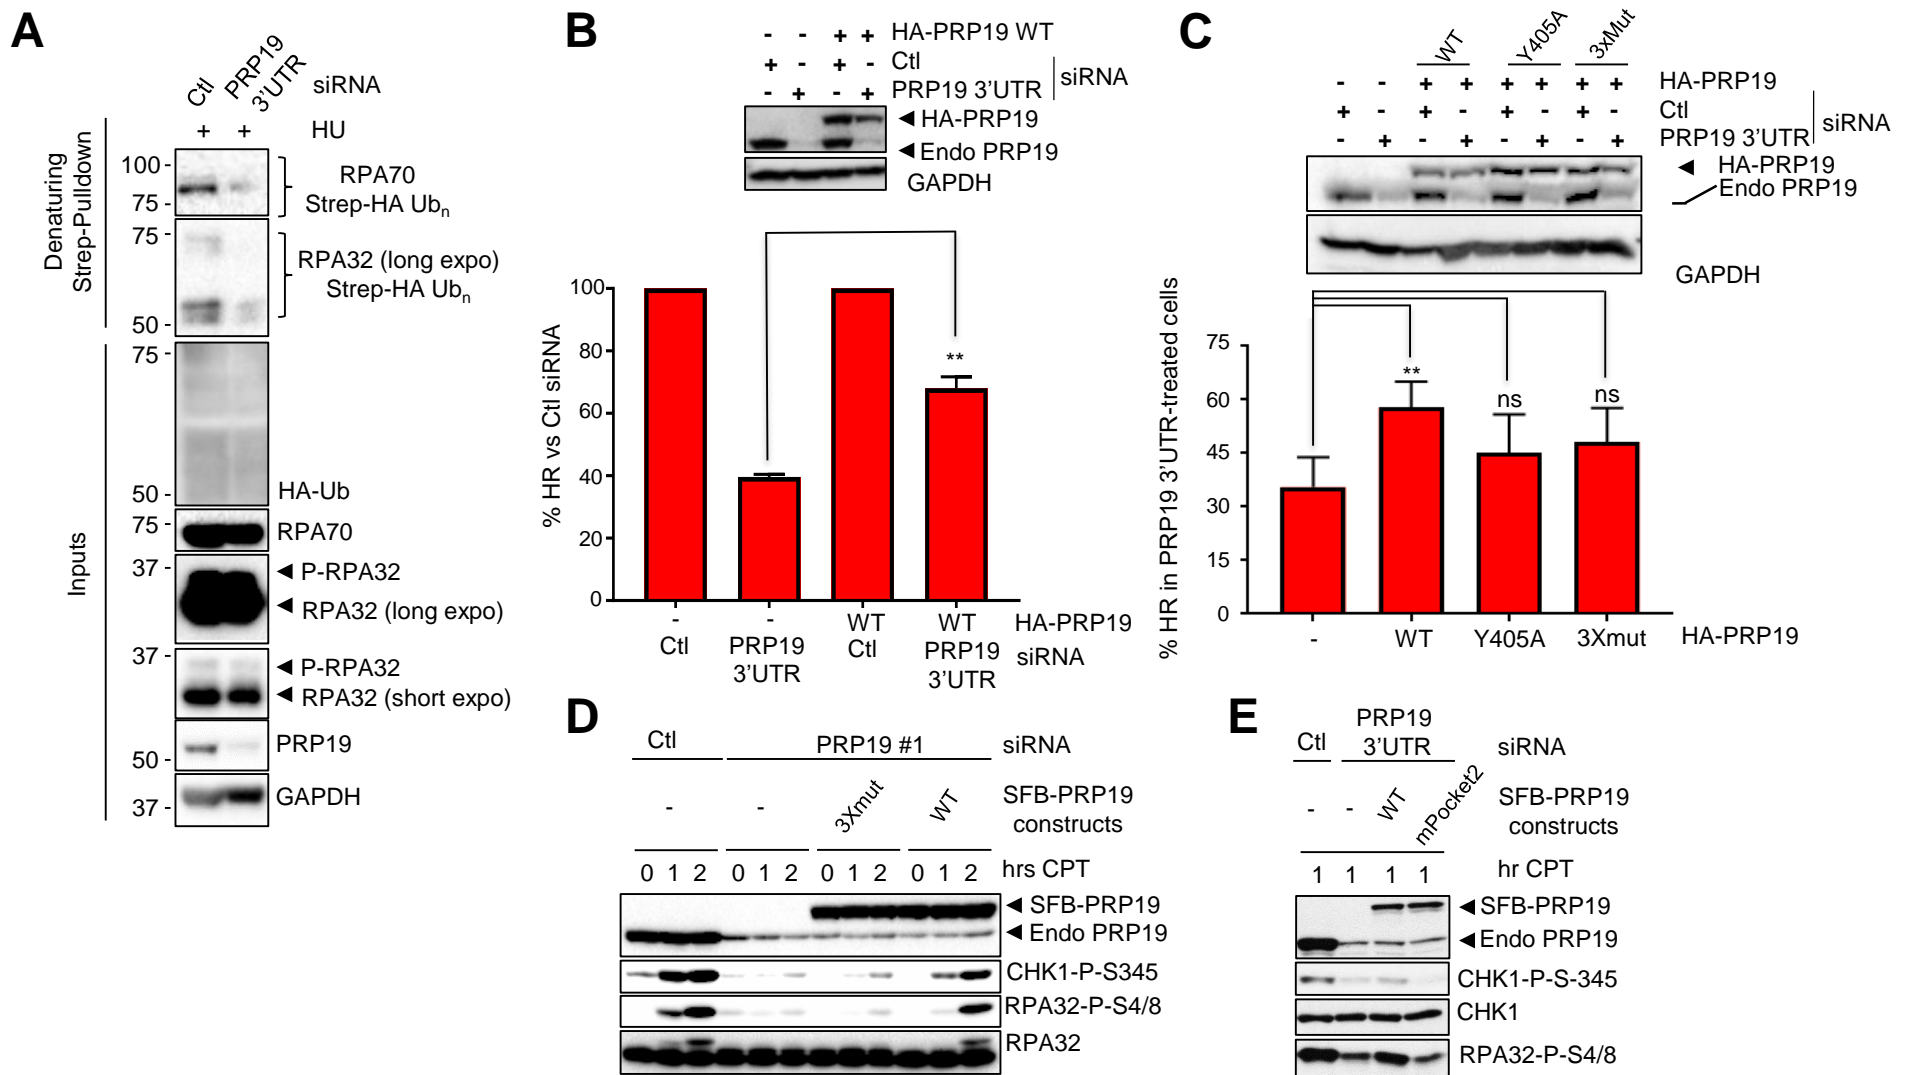

**Supplementary Figure S4. The PRP19-RPA binding pocket and ubiquitin ligase activity are required for homologous recombination and checkpoint activation.** (A) HEK293T cells were transfected with the indicated siRNA and a Strep-HA ubiquitin vector. Cells were subsequently treated with 2 mM HU for 4 hours lysed under denaturing conditions and strep-HA ubiquitin conjugated proteins were purified. (B,C) U2OS DR-GFP cells stably expressing HA-PRP19 constructs were transfected with Ctl or PRP19 3'UTR siRNAs and subsequently co-transfected with mCherry and I-Sce-I expressing plasmids. % HR is plotted relative to Ctl siRNA transfected cells. Graph represents the mean obtained from 4 independent experiments (\*\* =  $p < 0.01$ , Student's t-test). (D,E) HeLa cells were co-electroporated with PRP19-targeting siRNA and plasmids expressing siRNA-resistant WT, 3Xmut (C5A, V17E, Y33A (U-box defective) or mPocket2 mutants SFB-PRP19. 40 hrs later, cells were treated with 1  $\mu$ M CPT for the indicated times and CHK1 and RPA phosphorylation were assayed.

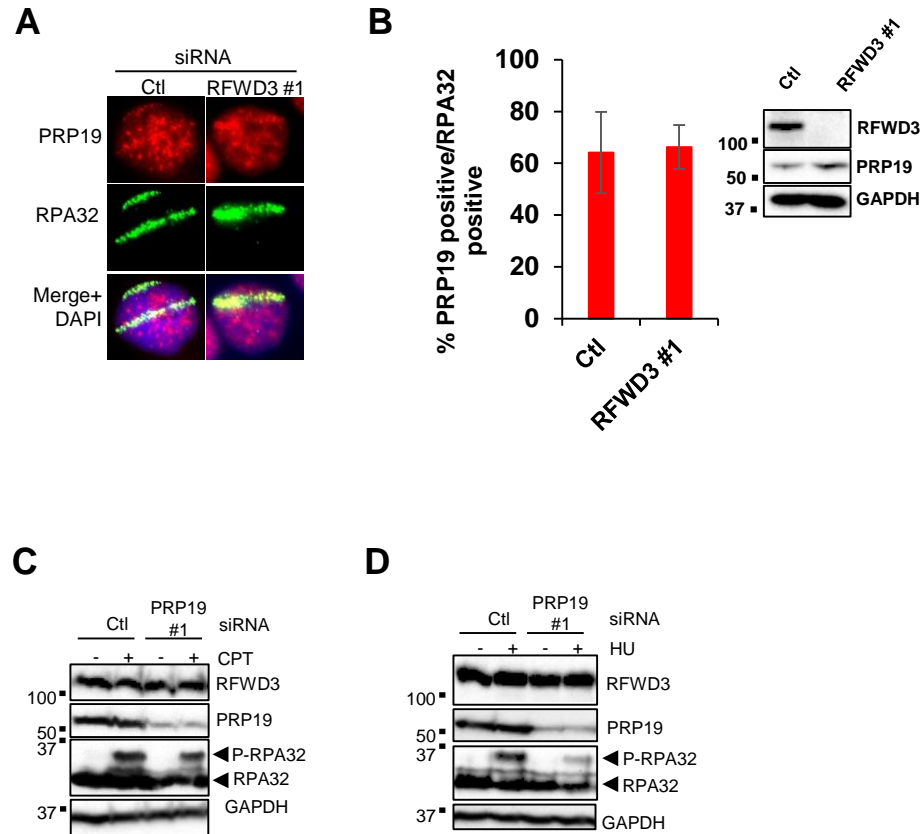

**Supplementary Figure S5. RFWD3 depletion does not impede PRP19 relocation to laser stripes and PRP19 Knockdown does not significantly affect RFWD3 protein levels (A)** Cells were transfected with the indicated siRNAs and microirradiated. 3 hours post-microirradiation, cells were processed for immunofluorescence and PRP19-positive RPA32-positive stripes were counted. Representative cells are shown. **(B)** 3 independent replicates were scored for a total of 176 Ctl and 218 RFWD3 siRNA transfected and microirradiated cells. No significant difference in PRP19 accumulation at sites of damage could be observed upon RFWD3 knockdown. **(C, D)** HEK293T cells were transfected with the indicated siRNAs and 48 hrs later were treated or not with 1 mM CPT or 2 mM HU for 3 hrs. Cells were collected, lysed and immunoblots against the indicated proteins were performed.

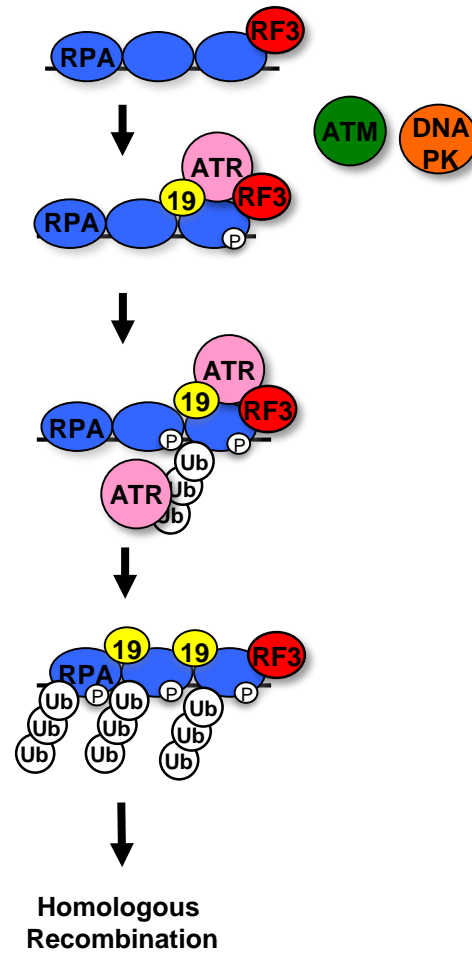

1. Replication stress induces RPA-ssDNA formation
2. RPA phosphorylation by ATR, ATM and DNAPK promotes its interaction with PRP19
3. PRP19 and RFWD3 promote ubiquitylation of the RPA-ssDNA platform which enhances RPA phosphorylation
4. Spreading of RPA phosphorylation and ubiquitylation on RPA-ssDNA promotes HR

Supplementary Figure S6. A working model for the regulation of RPA ubiquitylation during replication stress.
